# Supplementary material
Source: Research Square preprint supplement (doi:10.21203/rs.3.rs-9807107/v1)
Supplement: Supplementary file 1 [file 4baea42c799a09dd0381edcc.docx]

**Table 1:** **Demographic characteristics of mothers participating in the study**

| total | mean (years) | number (percentage) |  | Variable | |
| --- | --- | --- | --- | --- | --- |
| 14 (100) | 44/35 | - | Younger than 30 years | | mother's age | |
| 2 (14/28) | 30-40 | |
| 11(78/57) | 41-50 | |
| 1(7/14) | Older than 50 | |
| 14 (100) | 14/78 | 5(35/71) | 11 to older than 14 | | Adolescent's age | |
| 7(50) | 14-16 | |
| 2(14/28) | 16 to older than 19 | |
| 14 (100) | - | 7(50) | Girl | | Adolescent gender | |
| 7(50) | Boy | |
| 14 (100) | - | 2(14/28) | 1 | | Number of children | |
| 10(71/42) | 2 | |
| 2(14/28) | More than 2 | |
| 14 (100) | - | - | illiterate | | mother's education | |
| 2 (14/28) | Middle school degree or lower | |
| 6(42/85) | High school studies | |
| 6(42/85) | University studies | |
|  | - | 7(50) | housewife | | mother's job | |
| 7(50) | Working | |
| 14 (100) | - | - | Unemployed | | Spouse’s job | |
| 1(7/14) | Worker | |
| 4 (28/57) | Employee | |
| 9(64/28) | Self-employed | |
| 14 (100) | - | 2(14/28) | Low | | Household income | |
| 12(85/71) | Middle | |
| - | High | |
| 14 (100) | - | 14(100) | City | | Resident in | |
| - | Village | |

**Table 2:** **Demographic characteristics of the key informants participating in the study**

| occupation | level of education | field of study | Age | row |
| --- | --- | --- | --- | --- |
| Faculty member | PHD | Health education specialist | 54 | 1 |
| Faculty member | PHD | Health education specialist | 47 | 2 |
| Faculty member | PHD | Health education specialist | 42 | 3 |
| Faculty member | PHD | Social medicine specialist | 51 | 4 |
| Faculty member | PHD | Social medicine specialist | 54 | 5 |
| Faculty member | PHD | Social medicine specialist | 52 | 6 |
| Senior employee of the Ministry of Health | PHD | Reproductive health specialist | 41 | 7 |
| Faculty member | PHD | Demographic studies/reproductive health trend | 56 | 8 |
| Teacher | PHD | Clinical Psychology | 30 | 9 |
| Faculty member | PHD | General Psychology | 47 | 10 |
| Faculty member | PHD | Clinical Psychology | 52 | 11 |
| Doctor | Psychiatry specialist | Psychiatry | 41 | 12 |
| cleric | Master's degree | Islamic teachings | 68 | 13 |
| Faculty member | PHD | Health science specialist | 61 | 14 |
| Teacher | PHD | Sociology | 52 | 15 |
| Teacher | PHD | Sociology | 40 | 16 |
| Faculty member | PHD | Sociology | 44 | 17 |
| Faculty member | PHD | Sociology | 52 | 18 |
| Academic staff member and senior manager | MD-PHD | Epidemiology | 54 | 19 |
| Junior expert of Parashki Faculty of Sciences | Bachelor's degree | Midwifery | 53 | 20 |
| Adolescent expert at the University of Medical Sciences | Bachelor's degree | Midwifery | 55 | 21 |
| Consultant and psychologist of health centers | MA | Psychology | 34 | 22 |
| Consultant and psychologist of the health center | MA | Psychology | 32 | 23 |
| The healthcare provider of the health center | Bachelor's degree | Midwifery | 42 | 24 |
| Teacher-school counselor | MA | Psychology | 54 | 25 |
| Teacher-school counselor | Bachelor's degree | Psychology | 43 | 26 |
| Teacher-school counselor | MA | Clinical Psychology | 43 | 27 |
| Teacher-school counselor | MA | General Psychology | 45 | 28 |
| Teacher-educational coach | Bachelor's degree | Psychology | 41 | 29 |
| Teacher-school counselor | Bachelor's degree | Psychology | 41 | 30 |
| Teacher-school counselor | Bachelor's degree | Psychology | 44 | 31 |
| Teacher-school counselor | Bachelor's degree | Psychology | 33 | 32 |
| Teacher-school counselor | MA | Clinical Psychology | 42 | 33 |
| Teacher-educational coach | MA | Clinical Psychology | 44 | 34 |
