# Supplementary material
Source: Research Square preprint supplement (doi:10.21203/rs.3.rs-9807107/v1)
Supplement: Supplementary file 2 [file 7e78fe64f63514450c577b21.docx]

**Table3: Adolescent Reproductive and Sexual Health: Themes, Categories, and Quotes from Interviews**

| **Theme** | **Subcategories** | **Representative Quote** |
| --- | --- | --- |
| **1. Individual Challenges of Adolescents** | Intrapersonal characteristics and challenges | "We are facing a generation that has many emotions and wants to know and experience things much earlier than previous generations." (Key Informant, Sociologist) |
|  | Interactional and contextual challenges | "Cultural confrontation between generations has caused many adolescent interactions to remain hidden, and parents and schools are practically excluded from the communication cycle." (Key Informant, Health Sciences Expert) |
| **2. Political Challenges and Barriers** | Lack of coherent programs and policies | "In the field of adolescent sexual health, there is practically no overarching national program, and this issue has been marginalized." (Key Informant, Health Education Specialist) |
|  | Unresponsive governance structures | "Sexual health education should be delivered regularly and in the framework of formal collaboration between education and health sectors, similar to a mandatory course." (Key Informant, Psychiatrist) |
| **3. Economic Challenges** | Consequences of poverty on sexual and reproductive health | "When poverty comes, many values fade, and an individual may engage in behaviors for survival that they would not even have imagined before." (Key Informant, Health Sciences Specialist) |
|  | Need for social support and equitable access | "Vulnerable children and adolescents need special care, and this cannot be achieved without policy-making and institutional collaboration." (Key Informant, Psychologist) |
| **4. Religious Challenges and Barriers** | Lack of utilization of religious and spiritual capacities | "Islam is not opposed to sexual education, but the method and framework of its delivery are important." (Key Informant, Cleric) |
|  | Decline of religious beliefs and values | "Instability in religious beliefs is a serious challenge, and ignoring it will not make it manageable." (Key Informant, Social Medicine Specialist) |
| **5. Challenges Related to Education and Schools** | Importance of education | "If education is to be provided in the field of sexual health, the best place is school." (Key Informant, Social Medicine Specialist) |
|  | Unresponsive structure & limited scope | "Adolescents do not even have sufficient knowledge about basic issues such as diseases or the consequences of smoking." (Key Informant, School Counselor) |
|  | Use of effective educational strategies | "Education should be in the language of the adolescents and use tools like videos and workshops." (Key Informant, Psychiatrist) |
|  | School-family interaction | "If the family and school are not coordinated, education will not be effective." (Key Informant, Health Center Counselor) |
| **6. Challenges Related to Adolescent Mental Health** | Psychological problems and risky behaviors | "Many risky behaviors of adolescents stem from an emotional gap or an unresolved psychological problem." (Key Informant, Psychiatrist) |
|  | Weak support system | "An adolescent who needs psychological help usually either has no access or avoids visiting due to fear of being labeled." (Key Informant, Counselor) |
| **7. Puberty, Sexual Unawareness, and Lack of Systematic Education** | Early puberty and mismatch of development | "The adolescent’s body is ready, but their mind and awareness are not yet." (Key Informant, Social Medicine Specialist) |
|  | Sexual unawareness and misconceptions | "Neither the family talks about it, nor the school; the adolescent remains alone with their questions." (Key Informant, Family Counselor) |
| **8. Challenges Related to Cigarette, Alcohol, and Substance Use** | Increasing use among adolescents | "Cigarette use is very high among adolescents, especially girls... There is no law against selling cigarettes." (Mother, 39 years old) |
|  | Adolescents’ perspectives on causes & consequences | "Some families believe it is safe if their child drinks with them so they can manage it... Alcohol consumption facilitates unsafe sexual relations in parties." (Key Informant, Health Sciences Specialist) |
| **9. Role of Cyberspace and Media** | Early and unsupervised exposure | "Adolescents are exposed to sexual content much earlier than their readiness allows." (Key Informant, Psychiatrist) |
|  | Media shaping unrealistic norms | "What is displayed in cyberspace becomes the norm for adolescents." (Key Informant, Health Communication Specialist) |
|  | Weakening family & school roles | "Media moves ahead of families and schools." (Key Informant, Educational Counselor) |
|  | Lack of media literacy | "Adolescents do not know how to protect themselves in cyberspace." (Key Informant, Psychologist) |
| **10. Risky Sexual Behaviors and Consequences** | Prevalence & behavioral patterns | "When adolescents have not received education, they make riskier decisions." (Key Informant, Health Education Specialist) |
|  | Health-related and psychosocial consequences | "The physical and psychological consequences of these behaviors are usually recognized late." (Key Informant, Gynecology Specialist) |
|  | Need for prevention and early intervention | "Without education and prevention, we are only fighting the consequences." (Key Informant, Psychiatrist) |
| **11. Challenges Related to Ministry of Health** | Limited access to services & information | "The Ministry of Health should be very proactive... even if they do not participate, it is important that the message reaches the subconscious of adolescents." (Key Informant, Psychiatrist) |
|  | Structural & organizational barriers | "We should have adolescent service centers… there is no knowledgeable personnel; it should be integrated into primary healthcare levels." (Key Informant, Reproductive Health Specialist) |
| **12. Challenges Related to Family and Parents** | Importance and role of family | "Parents have an important role in educating their children… fathers and mothers should set certain rules and standards at home that everyone follows." (Key Informant, Health Education Specialist) |
|  | Deficiency in parental knowledge, skills, competencies | "Even families themselves do not have sufficient awareness and knowledge and do not know how to transmit this information." (Key Informant, Health Education Specialist) |
